# Supplementary material for: Influence of 4-week lower extremity high-intensity interval training on energy metabolism and maximal oxygen uptake of elite swimmers
Source: PeerJ. 2025 Jul 31;13:e19788. doi: 10.7717/peerj.19788 (PMC12318499; doi:10.7717/peerj.19788)
Supplement: Supplemental Information 1 [file peerj-13-19788-s001.xlsm]

## Sheet: 体操上-男
《体操（上）》课程教学日历
申报学校（盖章）：上海体育学院
课程名称：体操 （上） 课程负责人：蔡玉军 申报类型：国家级一流本科课程（线下）
序号	日期	周次	讲次	学时 （分钟）	教学内容 （要点）	授课 地点	学生 人数	教学 形式	思政映射
		1	1	90	0课程导学：观看线上课程简介 1队列队形：学习常规原地队列：立正、稍息、跨立、整齐（向右看齐、向左看齐、向中看齐、向前看齐、向前看）、报数、集合、解散、原地三面转法 2基本姿势：上肢：前平举、侧平举、斜上举、斜下举、向前绕环、向后绕环、向内绕环、向外绕环、胸前平屈、肩侧屈 3徒手操：学习定位徒手操 4准备活动：慢跑动员，俯撑、侧撑、仰撑组合，扳、压、踢、控腿，纵叉、横叉，分腿支撑，跪立下腰 5技能：（1）垫上：复习团身前滚翻、团身后滚翻，学习远撑前滚翻；（2）双杠：学习分腿坐前进一次支撑前摆 6体能：双杠支撑前后移动、双杠支撑摆动 7作业：线上理论学习：队列队形的概念与术语、队列队形的分类与内容、队列队形的组织与教学	体操房1楼	24	线下	课程导学：了解中国体操辉煌历史，增强民族自豪感；基本姿势：养成规范的行为习惯；	1-15次，16-30次课可以大概重复前15次课
		1	2	90	1队列队形：复习常规原地队列，学习原地队列变换：一列横队变二列横队及还原、一列横队变三列横队及还原、一路纵队变二路纵队及还原、一路纵队变三路纵队及还原 2基本姿势：躯干：团身、屈体、直体、体转、体侧屈、体前屈、上体绕环、髋绕环 3徒手操：复习定位徒手操，学习行进间徒手体操▲ 4准备活动：慢跑动员，扳、压、踢、控腿，纵叉、横叉，分腿支撑，跪立下腰，俯卧两头起，推小车 5技能：（1）支撑跳跃：复习上板起跳接垂直跳、挺身跳、团身跳、分腿跳，学习跳上高台成蹲撑、分腿立撑、屈体立撑接挺身跳下；（2）单杠：复习跳上成支撑接弹杠下、跳上成支撑接支撑前翻下，学习单腿摆越成骑撑接骑撑后腿向前摆越转体90度下▲ 6体能：引体向上，吊、震、摆、绕、转、拉肩 7作业：线上理论学习：徒手体操与轻器械体操的特点与作用、徒手体操与轻器械体操的内容与分类	体操房1楼	24	线下	队列队形：集体练习，培养团队精神； 技能练习：跳跃运动，勇于克服困难，提高意志品质
		2	3	90	1队列队形：复习原地队列变换；学习行进间步法：数步移动（五步以内）、原地踏步与立定、便步走与立定、齐步走与立定、正步走与立定、跑步走与立定 2徒手操：复习行进间徒手体操▲；学习棍棒操 3基本姿势：前踢腿、侧踢腿、后踢腿 4准备活动：慢跑动员，仰卧踢腿，兔子跳，纵叉、横叉，分腿支撑，跪立下腰 5技能：（1）垫上：复习远撑前滚翻、团身后滚翻，学习前滚翻分腿起；（2）双杠：复习支撑前后摆动、分腿坐前进一次支撑前摆，学习屈膝弹杠并腿进杠接支撑摆动 6体能：双杠支撑摆动 7作业：（1）线上理论学习：徒手体操与轻器械体操的术语、徒手体操与轻器械体操的创编与记写；（2）实践：创编徒手操	体操房1楼	24	线下	准备活动：通过下叉等柔韧练习，培养坚持不懈的体育精神； 体能练习：培养坚韧不拔的意志品质
		2	4	90	1队列队形：复习行进间步法；学习行进间转法：行进间向左转走与立定、行进间向右转走与立定、行进间向后转走与立定 2徒手操：复习棍棒操；学习哑铃操、球操、绳操、旗操▲ 3准备活动：慢跑动员，兔子跳，纵叉、横叉，分腿支撑，跪立下腰，爬墙倒立 4技能：（1）支撑跳跃：复习上板起跳接跳、跳上高台接挺身跳下，学习山羊分腿腾越；（2）单杠：复习单腿摆越成骑撑接骑撑后腿向前摆越转体90度下▲，学习蹬摆翻上成支撑 5体能：肋木举腿，吊、震、摆、绕、转、拉肩 6作业：（1）线上理论学习：徒手体操与轻器械体操的创编与教学实践（示范、讲解、带领与指挥）；（2）实践：创编徒手操	体操房1楼	24	线下	技术练习：单杠翻上成支撑，观摩保护帮助，了解团队协作的重要性； 作业：创编徒手操，提高学生勇于创新的进取精神
		3	5	90	1队列队形：复习行进间转法；学习队形练习：散开与靠拢（以右翼、左翼、××同学为基准，间隔、距离各两臂/两步——散开，以右翼、左翼、××同学为基准——靠拢） 2徒手操：考核操的创编与教学 3准备活动：慢跑动员，行进间踢腿练习，兔子跳，纵叉、横叉，分腿支撑1秒，跪立下腰，斜靠倒立 4技能：（1）垫上：复习远撑前滚翻、前滚翻分腿起，学习后滚翻分腿起；（2）双杠：复习分腿坐前进一次支撑前摆、屈膝弹杠并腿进杠接支撑摆动、挂臂前后摆动，学习支撑前摆成外侧坐接外侧坐转体180度成分腿坐 5体能：双杠支撑摆动 6作业：（1）线上理论学习：体操动作的术语与运用；（2）实践：创编徒手操	体操房1楼	24	线下	徒手操考核：体验教学设计与实践，了解职业特点，铺垫职业认同
		3	6	90	1队列队形：复习队列队形（全部） 2徒手操：考核操的创编与教学 3准备活动：慢跑动员，兔子跳，纵叉、横叉，分腿支撑1秒，跪立下腰，扳倒立 4技能：（1）支撑跳跃：复习山羊分腿腾越，学习侧腾越▲；（2）单杠：复习蹬摆翻上成支撑、单腿摆越成骑撑，学习骑撑转体180º成支撑接后摆下 5体能：引体向上，吊、震、摆、绕、转、拉肩 6作业：（1）线上理论学习：体操动作的保护与帮助（意义与趋势、种类与方法、运用与要求）；（2）实践：创编徒手操	体操房1楼	24	线下	作业：认真完成自学，养成良好的学习习惯
		4	7	90	1队列队形：复习队列队形（全部） 2徒手操：考核操的创编与教学 3准备活动：慢跑动员，行进间踢腿练习，兔子跳，纵叉、横叉，分腿支撑1秒，跪立下腰，扳倒立 4技能：（1）垫上：复习前滚翻分腿起、后滚翻分腿起，学习分腿慢起头手倒立2秒；（2）双杠：复习屈膝弹杠并腿进杠接支撑摆动、支撑前摆成外侧坐接外侧坐转体180度成分腿坐、挂臂前后摆动，学习挂臂摆动屈伸上成分腿坐 5体能：双杠支撑摆动 6作业：（1）线上理论学习：体操的起源与发展；（2）实践：创编徒手操	体操房1楼	24	线下	准备活动：通过下叉等柔韧练习，培养持之以恒的品质；双杠挂臂：克服苦难，勇敢坚毅
		4	8	90	1队列队形：复习队列队形（全部） 2徒手操：考核操的创编与教学 3准备活动：慢跑动员，兔子跳，纵叉、横叉，分腿支撑1秒，跪立下腰，扳倒立 4技能：（1）支撑跳跃：复习侧腾越▲、山羊分腿腾越，学习横箱屈腿腾越；（2）单杠：复习并腿（慢）翻上成支撑、单腿摆越成骑撑、骑撑转体180º成支撑，学习支撑后摆挺身下 5体能：俯卧两头起，吊、震、摆、绕、转、拉肩 6作业：（1）线上理论学习：体操的概念与特点；（2）实践：创编徒手操	体操房1楼	24	线下	队列队形：复习动作，精益求精；徒手操考核：互相学习，共同提高
		5	9	90	1队列队形：复习队列队形（全部） 2徒手操：考核操的创编与教学 3准备活动：慢跑动员，兔子跳，纵叉、横叉，分腿支撑2秒，跪立下腰，扳倒立 4技能：（1）垫上：复习后滚翻分腿起、分腿慢起头手倒立2秒，学习鱼跃前滚翻；（2）双杠：复习支撑前摆成外侧坐接外侧坐转体180度成分腿坐、挂臂摆动屈伸上成分腿坐、挂臂前后摆动，学习支撑后摆转体180º成分腿坐 5体能：双杠支撑摆动 6作业：（1）线上理论学习：体操的分类与内容；（2）实践：创编徒手操	体操房1楼	24	线下	技能练习：头手倒立，互相保护帮助，体验团队协作的重要性
		5	10	90	1队列队形：考核队列队形 2徒手操：考核操的创编与教学 3准备活动：慢跑动员，兔子跳，纵叉、横叉，分腿支撑2秒，跪立下腰，蹬摆扶持手倒立 4技能：（1）支撑跳跃：复习横箱屈腿腾越、侧腾越▲，学习斜向助跑直角腾越▲；（2）单杠：复习单腿摆越成骑撑、骑撑转体180º成支撑、支撑后摆挺身下，学习支撑后摆落杠接腹回环 5体能：肋木举腿，吊、震、摆、绕、转、拉肩 6作业：（1）线上理论学习：体操的地位与作用；（2）实践：创编徒手操	体操房1楼	24	线下	准备活动：兔子跳进阶练习，循序渐进，勇攀高峰
		6	11	90	1队列队形：考核队列队形 2徒手操：考核操的创编与教学 3准备活动：慢跑动员，兔子跳，纵叉、横叉，分腿支撑2秒，仰卧推起成桥，蹬摆扶持手倒立 4技能：（1）垫上：复习分腿慢起头手倒立2秒、鱼跃前滚翻，学习侧手翻；（2）双杠：复习挂臂摆动屈伸上成分腿坐、支撑后摆转体180º成分腿坐、悬垂前后摆动，学习前滚翻成分腿坐 5体能：双杠挂臂摆动 6作业：创编徒手操、体操体能练习	体操房1楼	24	线下	技能练习：双杠前滚翻成分腿坐，体验保护帮助作用，养成团队精神
		6	12	90	1队列队形：考核队列队形 2徒手操：考核操的创编与教学 3准备活动：慢跑动员，兔子跳，纵叉、横叉，分腿支撑2秒，仰卧推起成桥，蹬摆扶持手倒立 4技能：（1）支撑跳跃：复习斜向助跑直角腾越▲、横箱屈腿腾越，学习斜向助跑俯腾越▲；（2）单杠：复习支撑后摆落杠接腹回环、单腿摆越成骑撑、支撑后摆挺身下（平杠），学习后倒单挂膝摆动上接前腿向后摆越成支撑▲ 5体能：引体向上，吊、震、摆、绕、转、拉肩 6作业：创编徒手操、体操体能练习	体操房1楼	24	线下	体能练习：引体向上，多拉一个，坚持不懈就是胜利
		7	13	90	1队列队形：考核队列队形 2徒手操：考核操的创编与教学 3准备活动：慢跑动员，兔子跳，纵叉、横叉，分腿支撑提成跪撑，仰卧推起成桥，蹬摆扶持手倒立 4技能：（1）垫上：复习：鱼跃前滚翻、侧手翻，学习燕式平衡；（2）双杠：复习支撑后摆转体180º成分腿坐、前滚翻成分腿坐、悬垂前后摆动，学习支撑前摆挺身下 5体能：双杠挂臂摆动 6作业：创编徒手操、体操体能练习	体操房1楼	24	线下	徒手操：创编与教学，体验教师角色，增强职业认同感
		7	14	90	1队列队形：考核队列队形 2徒手操：考核操的创编与教学 3准备活动：慢跑动员，兔子跳，纵叉、横叉，分腿支撑提成跪撑，仰卧推起成桥，蹬摆扶持手倒立接前滚翻 4技能：（1）支撑跳跃：复习斜向助跑直角腾越▲、斜向助跑俯腾越▲；（2）单杠：复习支撑后摆落杠接腹回环、单腿摆越成骑撑、后倒单挂膝摆动上、前腿向后摆越成支撑▲、支撑后摆挺身下（高于杠），学习骑撑前回环 5体能：俯卧两头起，吊、震、摆、绕、转、拉肩 6作业：创编徒手操、体操体能练习	体操房1楼	24	线下	技能练习：单杠后摆挺身下，从低到高，勤于练习，勇攀高峰
		8	15	90	1队列队形：考核队列队形 2徒手操：考核操的创编与教学 3准备活动：慢跑动员，兔子跳，纵叉、横叉，分腿支撑提成跪撑，仰卧推起成桥，蹬摆扶持手倒立接前滚翻 4技能：（1）垫上：复习侧手翻、燕式平衡，学习前滚翻接分腿支撑稍停▲；（2）双杠：复习前滚翻成分腿坐、支撑前摆挺身下、悬垂前后摆动，学习支撑后摆下▲ 5体能：双杠挂臂摆动 6作业：创编徒手操、体操体能练习	体操房1楼	24	线下	技能练习：双杠支撑摆动等基础动作，重视细节，决定成败
		8	16	90	1队列队形：考核队列队形 2徒手操：考核操的创编与教学 3准备活动：慢跑动员，兔子跳，纵叉、横叉，分腿支撑提成跪撑，仰卧推起成桥，蹬摆扶持手倒立接前滚翻 4技能：（1）支撑跳跃：复习山羊分腿腾越、横箱屈腿腾越、侧腾越▲；（2）单杠：复习单腿摆越成骑撑、骑撑前回环、后倒单挂膝摆动上、前腿向后摆越成支撑▲，学习支撑后摆转体90度挺身下▲ 5体能：肋木举腿，吊、震、摆、绕、转、拉肩 6作业：体操典型动作教学（教案、备课）、体操体能练习	体操房1楼	24	线下	作业：典型动作教学，认真备课，增强对技术的理解和认识，培养团结意识
		9	17	90	1准备活动：慢跑动员，兔子跳，纵叉、横叉，分腿支撑提成蹲撑，仰卧推起成桥，蹬摆扶持手倒立接前滚翻 2技能：（1）垫上：复习燕式平衡、前滚翻接分腿支撑稍停▲，考核垫上动作教学1；（2）双杠：复习支撑前摆挺身下、支撑后摆下▲、悬垂前后摆动，考核双杠动作教学1 3体能：双杠挂臂摆动 4作业：体操典型动作教学（教案、备课）、体操体能练习	体操房1楼	24	线下	技能：考核垫上动作教学，激发发现问题、解决问题的意识	提高公平公正感，培养规则意识
		9	18	90	1准备活动：慢跑动员，兔子跳，纵叉、横叉，分腿支撑提成蹲撑，仰卧推起成桥，蹬摆扶持手倒立10秒接前滚翻 2技能：（1）支撑跳跃：考核支撑跳跃动作教学1，复习支撑跳跃动作；（2）单杠：考核单杠动作教学1，复习单杠动作串联 3体能：引体向上，吊、震、摆、绕、转、拉肩 4作业：体操典型动作教学（教案、备课）、体操体能练习	体操房1楼	24	线下	技能：复习动作，培养互相学习、共同进步的集体精神
		10	19	90	1准备活动：慢跑动员，兔子跳，纵叉、横叉，分腿支撑提成蹲撑，仰卧推起成桥，蹬摆扶持手倒立20秒接前滚翻 2技能：（1）垫上：考核垫上动作教学2，复习垫上动作串联；（2）双杠：考核双杠动作教学2，复习双杠动作串联 3体能：双杠挂臂摆动 4作业：体操典型动作教学（教案、备课）、体操体能练习	体操房1楼	24	线下	作业：典型动作教学，认真书写教案，培养负责的工作态度
		10	20	90	1准备活动：慢跑动员，兔子跳，纵叉、横叉，分腿支撑提成蹲撑，仰卧推起成桥，蹬摆扶持手倒立30秒接前滚翻 2技能：（1）支撑跳跃：考核支撑跳跃动作教学2，复习支撑跳跃动作；（2）单杠：考核单杠动作教学2，复习单杠动作串联 3体能：俯卧两头起，吊、震、摆、绕、转、拉肩 4作业：体操典型动作教学（教案、备课）、体操体能练习	体操房1楼	24	线下	技能：单杠动作教学，巩固技能水平，培养共同进步的集体意识
		11	21	90	1准备活动：慢跑动员，兔子跳，纵叉、横叉，分腿支撑提成分腿立撑，站立下腰，蹬摆扶持手倒立40秒接前滚翻 2技能：（1）垫上：考核：垫上动作教学3，复习垫上动作串联；（2）双杠：考核双杠动作教学3，复习双杠动作串联 3体能：双杠悬垂摆动 4作业：体操典型动作教学（教案、备课）、体操体能练习	体操房1楼	24	线下	技能：双杠动作教学，提高发现问题、解决问题的能力
		11	22	90	1准备活动：慢跑动员，兔子跳，纵叉、横叉，分腿支撑提成分腿立撑，站立下腰，蹬摆扶持手倒立50秒接前滚翻 2技能：（1）支撑跳跃：考核支撑跳跃动作教学3，复习支撑跳跃动作；（2）单杠：考核单杠动作教学3，复习单杠动作串联 3体能：肋木举腿，吊、震、摆、绕、转、拉肩 4作业：体操典型动作教学（教案、备课）、体操体能练习	体操房1楼	24	线下	体能练习：加强体能与技能关系的理解，培养主观能动性
		12	23	90	1准备活动：慢跑动员，兔子跳，纵叉、横叉，分腿支撑提成分腿立撑，站立下腰，蹬摆扶持手倒立3-50秒接前滚翻 2技能：（1）垫上：考核垫上动作教学4，复习垫上动作串联；（2）双杠：考核双杠动作教学4，复习双杠动作串联 3体能：双杠悬垂摆动 4作业：体操典型动作教学（教案、备课）、体操体能练习	体操房1楼	24	线下	技能：复习动作，注意细节，发现问题，提高质量
		12	24	90	1准备活动：慢跑动员，兔子跳，纵叉、横叉，分腿支撑提成分腿立撑，站立下腰，蹬摆扶持手倒立70秒接前滚翻 2技能：（1）支撑跳跃：支撑跳跃动作教学4，复习支撑跳跃动作；（2）单杠：考核单杠动作教学4，复习单杠成套动作 3体能：引体向上，吊、震、摆、绕、转、拉肩 4作业：体操典型动作教学（教案、备课）、体操体能练习	体操房1楼	24	线下	体能：坚持锻炼，逐渐提高，培养正确的价值观
		13	25	90	1准备活动：慢跑动员，兔子跳，纵叉、横叉，分腿支撑1秒提成分腿立撑，站立下腰，蹬摆扶持手倒立80秒接前滚翻 2技能：（1）垫上：考核垫上动作教学5，复习垫上动作串联；（2）双杠：考核双杠动作教学5，复习双杠动作串联 3体能：双杠悬垂摆动 4作业：体操典型动作教学（教案、备课）、体操体能练习	体操房1楼	24	线下	技能：考核双杠动作，提高发现问题、解决问题的能力
		13	26	90	1准备活动：慢跑动员，兔子跳，纵叉、横叉，分腿支撑1秒提成分腿立撑，站立下腰，蹬摆扶持手倒立90秒接前滚翻 2技能：（1）支撑跳跃：支撑跳跃动作教学5，复习支撑跳跃动作；（2）单杠：考核单杠动作教学5，复习单杠成套动作 3体能：俯卧两头起，吊、震、摆、绕、转、拉肩 4作业：体操典型动作教学（教案、备课）、体操体能练习	体操房1楼	24	线下	作业：典型动作教学，提高完成质量，完成职业能力储备
		14	27	90	1准备活动：慢跑动员，兔子跳，纵叉、横叉，分腿支撑1秒提成分腿立撑，站立下腰，分腿立撑蹬摆倒立接前滚翻 2技能：（1）垫上：考核垫上动作教学6，复习垫上动作串联；（2）双杠：考核双杠动作教学6，复习双杠动作串联 3体能：双杠悬垂摆动 4作业：体操典型动作教学（教案、备课）、体操体能练习	体操房1楼	24	线下	技能：动作教学，加强学生业务能力，培养爱岗敬业与钻研创新精神
		14	28	90	1准备活动：慢跑动员，兔子跳，纵叉、横叉，分腿支撑2秒提成分腿立撑，站立下腰，分腿立撑蹬摆倒立接前滚翻 2技能：（1）支撑跳跃：支撑跳跃动作教学6，复习支撑跳跃动作；（2）单杠：考核单杠动作教学6，复习单杠成套动作 3体能：肋木举腿，吊、震、摆、绕、转、拉肩 4作业：体操典型动作教学（教案、备课）、体操体能练习	体操房1楼	24	线下	技能：动作教学，提高纠错、评判、自我反思能力
		15	29	90	1准备活动：慢跑动员，兔子跳，纵叉、横叉，分腿支撑2秒提成分腿立撑，站立下腰，分腿立撑蹬摆倒立接前滚翻 2技能：（1）复习垫上成套动作；（2）复习双杠成套动作 3体能：双杠悬垂摆动 4作业：体操体能练习	体操房1楼	24	线下	技能：复习动作，培养精益求精的工匠精神
		15	30	90	1准备活动：慢跑动员，兔子跳，纵叉、横叉，分腿支撑2秒提成分腿立撑，站立下腰，分腿立撑蹬摆倒立接前滚翻 2技能：（1）复习支撑跳跃动作；（2）复习单杠成套动作 3体能：引体向上，吊、震、摆、绕、转、拉肩 4作业：体操体能练习	体操房1楼	24	线下	体能：掌握原理与方法，培养钻研创新精神
		16	31	90	考试：垫上成套动作、双杠成套动作	体操房1楼	24	线下	考试：掌握规则，培养公平公正的职业道德
		16	32	90	考试：单杠成套动作、支撑跳跃动作	体操房1楼	24	线下	考试：培养规则意识及遵纪守法的品质
注：标▲的动作为拓展内容。

## Sheet: 专享课
主题	时间	讲师	大纲	备注	学习资料
专享课为AI进化营付费用户专项课程，以时间为轴，滚动更新，大家可以按顺序学习，逐步打磨基础。
提问模型的深入使用（上）：选题功能	45056	一平老师	1 选题层层细化模型 2 研究gap模型 3 研究问题类型学模型 4 模型的综合使用	学习在ai进化营的链接	ai进化营内部分享（选题）2023.5.10
提问模型的深入使用下（下）：文献综述	45061	一平老师	1 文献分类模型 2文献评价模型 3文献提出问题模型 4模型的综合使用		ai进化营内部分享（综述）2023.5.15
最炸裂的AI学术写作工具：BingChat	45079	一平老师	BingChat的十大无可替代的功能 BingChat的几大无伤大雅的缺点 BingChat相关插件及拓展功能		最炸裂的AI学术写作工具:BingChat
小模型与大模型炸裂组合：青泥学术与ChatGPT的黄金搭档	45103	学君老师	青泥学术的基本功能介绍 小模型和大模型组合和桥接 小模型和大模型的隐性效率打法		小模型与大模型炸裂组合：青泥学术与ChatGPT的黄金搭档
AI工具大分享，带你玩转大模型	45148	苏老师	一、国外大模型详解 二、国内大模型详解 三、协同办公大模型详解 四、聚合平台详解		AI工具大分享，带你玩转大模型
AI辅助省级教育科学规划课题申请书写作（一）	45153	stone老师	1. AI辅助分析相关教育政策文件 2.AI辅助分析立项选题与指南选题 3.AI辅助分析选题指南 4.AI辅助选题寻找 5.AI辅助核心概念界定		AI辅助省级教育科学规划课题申请书写作（第一讲）
AI辅助省级教育科学规划课题申请书写作（二）	45155	stone老师	1. AI辅助国内外研究现状及研究价值写作 2.AI辅助研究目标写作 3.AI辅助研究内容写作 4.AI辅助研究重点提炼 5.AI辅助主要观点提炼 6.AI辅助创新之处提炼 7.AI辅助预期研究成果拟定		AI辅助省级教育科学规划课题申请书写作（第二讲）
框架思维与模糊创新:青泥学术如何助力学术小白超神	45181	张深刻老师	1.点燃选题:如何利用青泥学术照亮研究之路? 2.框架构筑: 用青泥学术搭建研究大厦 3.解码困境: 青泥学术如何巧思论证逻辑? 4.创新链接: 青泥学术与大语言模型的完美结合		9.12第8次进化营内部私享课
文献管理神器-Zotero	45192	Chris老师			文献管理神器——Zotero（AI工具打造文献流提升科研效率）
Obisidian在学术教学中的应用	45196	周立萌老师	1.markdown语法:内容与形式分离 2.yaml区:回归数据的本质 3.插件联动:让obsidian更加强大
发表SSCI期刊论文：如何起步	45205	罗娜老师
AI插件大揭秘：工具化的未来智能	45223	苏老师			AI插件大揭秘：工具化的未来智能
创意无限：DALL-E 3助力学术图景构想	45243	张深刻老师			链接：https://pan.baidu.com/s/1rHGR6Uv-dBO0at-QqIW9tg?pwd=cw04 提取码：cw04
GPTs的划时代意义与实操演示	45247	学君老师			GPTs的划时代意义与实操演示

## Sheet: 系列课
非常重要，请认真查看：本表格所有内容，均开通在ai进化营购买手机号上（开课前完成），请各位下载学术志app，或者使用学术志官网www.xueshuzhi.net 用手机号登陆后，在已购里查看课程。 需要补充知识多，所以前期节奏密集，后续逐步放缓～
主题	时间	链接	大纲	课件及资料链接
AI赋能博士论文写作课	9月4日-9月11日	http://h5.xueshuzhi.net/SeriesCourse/SeriesCourseDetail?id=87d3060f538d45a49b007098239cb9d5		ChatGPT辅助博士学位论文写作 学习文档（涵国内入口）
备课革命：从0到1掌握AI制作教学PPT	先导课：9月1日 主讲时间： 10月13-17日	http://h5.xueshuzhi.net/SeriesCourse/SeriesCourseDetail?id=8af41b1f00f24e47ad08a759cdae8794		先导课课件：https://www.kdocs.cn/l/cbGNpVfyNTHm 第一讲：无课件，实操课 第二讲：https://kdocs.cn/l/chTl2EeirUpN 第三讲：https://kdocs.cn/l/cqdBccjqEgM1 第四讲：https://kdocs.cn/l/cvrSAr0HTpjS 第五讲：https://kdocs.cn/l/cv7jPJ2Sxaps 插件下载：https://pan.baidu.com/s/1mtbod9VknX7W2B0uX4CsTQ?pwd=w4pp 提取码：w4pp
文献阅读与文献综述AI工具箱	10月11日-10月25日	http://h5.xueshuzhi.net/SeriesCourse/SeriesCourseDetail?id=74f2354f3a684b8c90515d3b58f270a2		✅课件资料网盘链接：https://pan.baidu.com/s/1z2z-CssLGpzs209lGg6pMA?pwd=1234 提取码：1234 Prompt解读 飞书链接： https://uwqiu6ut3ly.feishu.cn/docx/TweqdUgZmosSUwx0IdRcDHXDnCg?from=from_copylink 密码：pJo7
借助AI工具完成人文社科课题申报系列课程	11月1日-7日	http://h5.xueshuzhi.net/Course/LiveDetail?guid=47134c3ca1154cb5a63a1db80c83aba8		AI辅助课题申报书写作系列课程
手把手带你get文献管理神器——Zotero	11月14-23日	http://h5.xueshuzhi.net/SeriesCourse/SeriesCourseDetail?id=3f3c77ab466145b0b685f428b272c464		手把手带你get文献管理神器——Zotero 学习文档
AI辅助零基础量化文本数据分析与写作系列课	12月13-20日	http://h5.xueshuzhi.net/Course/LiveDetail?guid=925e3ba8aa77457da5e71237d563b3c2
Al辅助下学术论文写作系列课	12月25-12月29日	http://h5.xueshuzhi.net/Course/LiveDetail?guid=2651af77a63543b794e0318bf7138dac		待补充

## Sheet: 1组
	第一组
	week		第一周					第二周					第三周
	姓名	动作	80%1RM	Set 1	Set 2	Set 3	Set 4	83%1RM	Set 1	Set 2	Set 3	Set 4	85%1RM	Set 1	Set 2	Set 3	Set 4
	包宇皓	DS	140					145					150
		BP	90					92.5					95
	邵慧勇	DS	120					125					130
		BP	90					92.5					95
	徐焕	DS	120					125					130
		BP	80					82.5					85
	孙俊辉	DS	105					110					115
		BP	85					87.5					90
	刘启群	DS	105					110					115
		BP	80					82.5					85
	陈子奇	DS	105					110					115
		BP	90					97.5					100

## Sheet: 2组
	第二组
	week		第一周					第二周					第三周
	姓名	动作	80%1RM	Set 1	Set 2	Set 3	Set 4	83%1RM	Set 1	Set 2	Set 3	Set 4	85%1RM	Set 1	Set 2	Set 3	Set 4
	程思博	DS	140					145					150
		BP	70					72.5					75
	张振业	DS	120					125					130
		BP	70					82.5					85
	唐骏	DS	120					125					130
		BP	72.5					75					80
	王清	DS	105					110					115
		BP	70					72.5					75
	冯岩新	DS	95					100					105
		BP	65					67.5					70
	刘淯航	DS	95					100					105
		BP	65					67.5					70

## Sheet: W1-1
11.21（Tue）训练计划
目的：增强下肢最大力量和爆发力
准备活动	动态拉伸						游戏
	一般性热身						弹力带激活
	神经激活						燕式平衡、超人拉伸、最伟大拉伸、毛毛虫变式
第一周							星期二
							负荷		次数——组数		间歇时间		NOTES注释
主要练习	深蹲						80%1RM		6次--4组		180s
	卧推						80%1RM		6次--4组		180s
增强式训练	坐姿起跳						自重		12次--4组		90s		实际未完成
	跳深+立定跳远+垂直跳						自重		8次--4组		90s
	仰卧药球速推						根据能力选择		10次--4组		90s
核心训练	药球核心训练						自重		8次--4组		90s
软组织再生按摩放松
恢复再生	拉伸放松与按摩						被动拉伸
							泡沫轴松解

## Sheet: W1-2
11.23（Thu）训练计划
目的：增强下肢最大力量和爆发力
准备活动	动态拉伸						SL抱膝、斜向抱膝、股四拉伸、最伟大拉伸（3向）
	一般性热身						转髋、SL RDL、侧弓步、 踏步
	神经激活						直膝跑、交叉步、小步后退、大步后退
第一周							星期四
							负荷		次数——组数		间歇时间		NOTES注释
主要练习	深蹲						80%1RM		6次--4组		180s
	卧推						80%1RM		6次--4组		180s
增强式训练	坐姿起跳						自重		12次--4组		90s
	跳深+立定跳远+垂直跳						自重		8次--4组		90s
	仰卧药球速推						根据能力选择		10次--4组		90s
核心训练	药球核心训练						自重		8次--4组		90s
软组织再生按摩放松
恢复再生	拉伸放松与按摩						被动拉伸
							泡沫轴松解

## Sheet: 【必读】总目录
	Eexcel表格总目录（作者：B站好人松松 可任意分享）
	！！！务必先看配套的B站视频才能懂这套表格 视频链接：https://www.bilibili.com/video/BV1zu4m1N76R
	板块		序号	名称	【代做个人方案】如果你看不懂原视频，要我代给你做个人方案（饮食+训练），请用微信扫描下面这个腾讯文档，填写个人调查问卷 【充电学习社群】我做的B站健身学习社群，饮食训练干货讲解，每月5元，请用微信扫描下面的二维码即可加入。内容：①B站直播课2次/月 ②B站图文动态5篇/月 ③充电粉丝群聊（发资料和回放） ④每月所有内容整理打包后用B站私聊发给充电用户（防止有些人错过内容）
	饮食表	减脂饮食方案	1	早饭后练（早起版）
			2	早饭后练（晚起版）
			3	午饭前练
			4	午饭后练
			5	晚饭前练
			6	晚饭后练
			7	夜里练
			8	无力训者
		增肌饮食方案	9	早饭后练（早起版）
			10	早饭后练（晚起版）
			11	午饭前练
			12	午饭后练
			13	晚饭前练
			14	晚饭后练
			15	夜里练
		有氧热量消耗	16	有氧热量消耗
		问答汇总	17	减脂-问答汇总
			18	增肌-问答汇总
	训练表	训练计划	19	健身房三分化
			20	健身房四分化（肩单练版）
			21	健身房四分化（手臂单练版）
			22	居家三分化
		基础解剖	23	动作-关节-肌肉的映射关系

## Sheet: 1减脂-早饭后练（早起版）
	减脂方案（体重1-2周稳定不掉 请看表17《减脂-问答汇总》的第1问来调整）
	性别	自己输入
	身高	自己输入
	体重	自己输入
	BMI	自己输入	* BMI=体重kg÷身高m÷身高m 正常18.5-24 超重24-28 肥胖大于28
	减重速度	理论上2周减重2%，注意1-2周的体重比较才有意义，每天脂肪分解量只有30-50g，会被体内的食糜重量和含水量变化轻易覆盖，所以两三天的体重变化基本和脂肪量变化无关，没有参考意义
	减到何时	肌肉量一般，不要追求低体脂，男性BMI22-23转增肌，女性BMI20-21转增肌；肌肉量足够，可以减到更低体重成为低体脂，男性BMI21-22转增肌，女性BMI19-20转增肌
	调整配额	体重下降10kg，基础代谢才会下降约150大卡，如果减重10kg以内不用调整；如果减重达到10kg还要继续，为了损失的150大卡，可以每天少吃约40g碳水（130g米饭），或者每周增加跑步/爬楼/打球1.5-2小时，或者两者各半
	力训时间	上午起床早，早饭后练， 因此早饭作为练前餐垫肚子，练后吃全天最大的一顿练后餐；力训日全天餐序：①早饭=练前餐 ②练后餐 ③午饭=其他餐 ④晚饭=其他餐
	热量设计 （不用看）	基础数据	基础代谢(a)	自己输入		* 多算两次，切勿算错，否则后续会全错！Mifflin-St Jeor方程：男性基础代谢=体重kg×9.99+身高cm×6.25-年龄×4.92+5；女性基础代谢=体重kg×9.99+身高cm×6.25-年龄×4.92-161
			无运动总消耗(b=a÷0.7)	自己输入		* 在没有力训、有氧的情况下，基础代谢约占人体热量消耗的70%，其余的热量消耗为食物热效应和活动消耗（因为无运动，活动消耗就是日常活动消耗）
			力训消耗(c)	自己输入		* 力训的热量消耗建议数据：男性，200大卡（新手）、250大卡（有基础）、300大卡（老手）；女性，100大卡（新手）、150大卡（有基础）、200大卡（老手）
			有氧消耗(d)	自己输入		* 如果要做有氧，参考《有氧热量消耗》表的数字填报（注意这是平均到每天的数字，如果是一周有氧消耗，要除以7再填入）
		平衡热量	力训日(e1=b+c+d)	自己输入		* 这是理论上的平衡热量，意即理论上这个饮食热量能让体重不变，力训日因为多了力训的热量消耗，所以力训日的平衡热量高一些
			休息日(e2=b+d)	自己输入
		应吃热量	力训日(f1=e1×0.64)	自己输入		* 减脂的合适热量缺口为10-30%（取20%），此外研究表明人们在定量饮食里也会不自觉多吃10-30%热量（取20%），所以减脂的应吃热量计为上述理论平衡热量的1×80%×80%=64%
			休息日(f2=e2×0.64)	自己输入
	饮食总览			碳水				蛋白质				脂肪	蔬菜/水果
		力训日		输入配额		输入体重	相乘得出总量	输入配额		输入体重	相乘得出总量	男性60g（120kg体重以上加到70g） 女性50g 但不要细算脂肪 按下面的文字指导来吃就行	按下面的文字指导
		休息日		输入配额		输入体重	相乘得出总量	输入配额		输入体重	相乘得出总量
	运动总览	力训		力训和减脂没有直接关系，减脂需要的热量缺口可以用饮食来提供，而不是必须力训来提供；但力训的好处是能减少减脂期的肌肉损失，想保持肌肉需要练3-5次/周
		有氧		是否需要有氧，请看视频11分8秒，一般建议：增肌不做有氧；减脂体重80kg以上不做有氧；减脂体重70-80kg先不做有氧，如果饿再加有氧；减脂体重70kg以下每周2小时有氧
HR														SS
	力训日饮食
	* 食物的123456是任选一种，不是都吃，每种食物互相等价，碳水或蛋白质的量是相同的 * 食物重量我已给你算好，你在初期必须用食物称定量饮食，建立饮食习惯后就不用了
	餐序			碳水				蛋白质				脂肪	蔬菜/水果
	①早饭=练前餐			0				0
				1.	0			1.	鸡蛋+牛奶，数量参考视频25分30秒			脂肪这样吃↓	蔬菜不限制↓
				2.	0			2.	鸡蛋，数量参考视频25分30秒			【推荐模式】早饭吃左侧的蛋黄牛奶+正餐吃大众带油菜=脂肪摄入基本合适 :)	【蔬菜不用定量】蔬菜碳水率很低，为免麻烦不用定量，争取每天都能吃一些
				3.	0			3.	0
	* 吃了早饭就准备开练，不需要专门等待休息 * 怕太饱的话，可吃低饱腹感碳水（馒头/面包/面条）			4.	0			4.	0			* 所谓吃“大众带油菜”，就是像黄焖鸡、酸菜鱼、鱼香肉丝、小炒牛肉等家常瘦肉菜，不要害怕菜里的油，但必须是瘦肉，高脂肉会导致脂肪超标（下面讲了什么是瘦肉，什么是高脂肉）	* 吃蔬菜的顺序：一般各餐，先吃、多吃蔬菜，后吃碳水，能压制胰岛素，帮助减脂；但力训的练后餐则相反，建议先吃碳水和蛋白质，少吃、后吃蔬菜，避免胰岛素被压制
				5.	0			* 脂肪摄入一个基本来源是早饭的蛋黄牛奶，如果不吃蛋黄牛奶，请看右边脂肪一列【脂肪缺乏1】
				6.	0
				7.	0
	②练后餐			0				0				【脂肪缺乏1】早饭不吃蛋黄牛奶，会比推荐模式少吃约10-20g脂肪摄入，请补吃20g坚果或3个蛋黄	【这些不是蔬菜】红薯（20%）、土豆（18%）、玉米（18%）、山药（13%）、芋头（13%）是碳水主食，括号数字是其碳水率
				1.	180			1.	0
				2.	230			2.	0
	* 最好能练完后半小时内开始吃上 * 本餐如要吃蔬菜，少吃后吃以免压制胰岛素 * 有时没正餐可吃，可用便携快碳+蛋白粉解决			3.	110			* 脂肪摄入另一基本来源是吃炒菜时摄入的油，如果正餐吃低油无油菜（卤肉、炖肉、清炒、清炖、轻食、水煮），请看右边脂肪一列【脂肪缺乏2】
				4.	70							【脂肪缺乏2】正餐吃低油无油菜（卤肉、炖肉、清炒、清炖、轻食、水煮），会比推荐模式少吃约20g脂肪摄入，请补吃30g坚果或4个蛋黄
				5.	300
				6.	270
	③午饭=其他餐			0				0				——————————————————	——————————————————
				1.	0			1.	0			脂肪基本不吃↓	水果必须置换主食↓
				2.	0			* 瘦肉只有：①没有白色脂肪层的猪牛羊肉 ②去皮的鸡鸭肉 ③鱼虾贝 ④肝肾肚血 * 这些不是瘦肉：鸡鸭的皮、猪大排、糖醋里脊、锅包肉、炸鸡、烤肉、午餐肉、肥牛、肥羊、排骨、牛排、肉肠、肉饼、肉馅、肉丸				【高脂肉】鸡鸭的皮、猪大排、糖醋里脊、锅包肉、炸鸡、烤肉、午餐肉、肥牛、肥羊、排骨、牛排、肉肠、肉饼、肉馅、肉丸	【水果要算碳水】水果实质是糖水，糖量可观，糖是碳水的一种形式，所以要计入碳水量来置换碳水那列的主食
	* 练后餐刚吃了没多久，这顿可以晚些吃或少吃点			3.	0
				4.	0
				5.	0							* 瘦肉只有：①没有白色脂肪层的猪牛羊肉 ②去皮的鸡鸭肉 ③鱼虾贝 ④肝肾肚血	*苹果/橙子/香蕉：20-30g碳水/个；梨子/蓝莓/猕猴桃：碳水率14%；柚子/桃子/葡萄/菠萝：碳水率10%；西瓜/蜜瓜/草莓：碳水率7%
	④晚饭=其他餐			0				0
				1.	0			1.	0
				2.	0							【糖油混合物】饼干、蛋糕、点心、糕点、甜品、油条、煎饼、高脂面包、膨化食品等	【置换主食的办法】吃水果的10g碳水=主食少吃30g熟米饭
				3.	0
				4.	0							* 糖油混合物的脂肪率高达20-40%，一次容易吃两三百克之多，只能偶尔吃点解馋
				5.	0
	⑤零食/夜宵			0				0
				1.	不吃碳水食物（水果、面包、奶茶、米面）			1.	0			【个别吸油菜】炒鸡蛋、炒茄子
	* 如果不吃零食/夜宵，请看右边红字的指导			2.	不吃糖油混合物（饼干、糕点、膨化食品）			2.	其他可选：乳制品、鸡蛋、蔬菜、无糖饮料			* 食堂外卖的宽油炒鸡蛋，每个鸡蛋的蛋白质只有6g，脂肪或高达20g以上，非常占据脂肪配额
				* 这10%的碳水是用来抵扣本列未计入的牛奶、蔬菜、调料里的碳水，所以不另外吃含碳水的食物了				* 你不吃零食夜宵也可以，就把这上面这点蛋白质配额给其他几餐，量并不多
	力训日合计			0				0				要点：脂肪配额有限 用来吃炒菜和蛋奶	要点：蔬菜任意吃 水果要算碳水
HR														SS
	休息日饮食
	* 食物的123456是任选一种，不是都吃，每种食物互相等价，碳水或蛋白质的量是相同的 * 食物重量我已给你算好，你在初期必须用食物称定量饮食，建立饮食习惯后就不用了
	餐序			碳水					蛋白质			脂肪	蔬菜/水果
	①早饭（和绿表早饭完全相同）			0				0				同上表	同上表
				1.	0			1.	鸡蛋+牛奶，数量参考视频25分30秒
				2.	0			2.	鸡蛋，数量参考视频25分30秒
				3.	0			3.	0
				4.	0			4.	0
				5.	0			* 脂肪摄入一个基本来源是早饭的蛋黄牛奶，如果你不吃蛋黄牛奶，请看右边脂肪一列的【脂肪缺乏1】
				6.	0
				7.	0
	②午饭			0				0
				1.	0			1.	0
				2.	0			* 脂肪摄入另一基本来源是带油菜的用油，如果你的正餐吃低油无油菜（卤肉、炖肉、清炒、清炖、轻食、水煮），请看右边脂肪一列的【脂肪缺乏2】
				3.	0
				4.	0
				5.	0
	③晚饭			0				0
				1.	0			1.	0
				2.	0			* 瘦肉脂肪率一般不超过5%，基本只有：①没有白色黄色脂肪层的猪牛羊肉 ②去皮鸡鸭肉 ③鱼虾 * 这些都不是瘦肉：鸡皮鸭皮、猪大排、糖醋里脊、锅包肉、烤肉、午餐肉、肥牛、肥羊、排骨、牛排、肉肠、肉饼、肉馅、肉丸
				3.	0
				4.	0
				5.	0
	⑤零食/夜宵			0				0
				不吃碳水食物（水果、面包、奶茶、米面）				1.	0
	* 如果不吃零食/夜宵，请看右边红字的指导			不吃糖油混合物（饼干、糕点、膨化食品）				2.	其他可选：乳制品、鸡蛋、蔬菜、无糖饮料
				* 这10%的碳水配额是用来抵扣本列未计入的牛奶、蔬菜、调料的碳水，所以不另外吃含碳水的食物了				* 你不吃零食夜宵也可以，就把这上面这点蛋白质配额给其他几餐，量其实很少的
	休息日合计			0				0				要点：脂肪配额有限 用来吃炒菜和蛋奶	要点：蔬菜任意吃 水果要算碳水
HR														SS
	力训方案
	频率			力训和减脂没有直接关系，减脂需要的热量缺口可以用饮食来提供，而不是必须力训来提供；但力训的好处是能减少减脂期的肌肉损失，想保持肌肉需要练3-5次/周
	分化			完全新手：用二分化或三分化；有基础者：用三分化或四分化
	场所			新手尽量从健身房起步健身，非必要不要居家力训，居家力训对新手反而更难上手，如果必须居家健身，参照《训练计划-居家健身》的指导
	训练计划			健身房三分化/健身房四分化/居家三分化训练计划，详见《训练计划》表格
HR														SS
	有氧方案
	概况			是否需要有氧，请看视频11分8秒，一般建议：增肌不做有氧；减脂体重80kg以上不做有氧；减脂体重70-80kg先不做有氧，如果饿再加有氧；减脂体重70kg以下每周2小时有氧
	形式			快走、跑步、骑行、游泳、爬楼、跳操、打球等均可，可以自测15秒脉搏算下心率，建议120-150次/分钟，但无需严格要求，有的有氧运动心率是高低波动不稳定的
	时间点			①力训前，不要做有氧，会影响力训；②力训后，如果要做有氧，一般不要超过30分钟；③超过30分钟的有氧，要和力训隔开几小时，或者在休息日做
	有氧可以置换饮食（重要）			如果试吃后感觉很饿，就可以增加有氧来让自己多吃一点，每增加有氧消耗100大卡，饮食热量就能多吃100大卡，具体请看配套的《有氧热量消耗》那张表

## Sheet: 2减脂-早饭后练（晚起版）
H
	减脂方案（体重1-2周稳定不掉 请看表17《减脂-问答汇总》的第1问来调整）
	性别	自己输入
	身高	自己输入
	体重	自己输入
	BMI	自己输入	* BMI=体重kg÷身高m÷身高m 正常18.5-24 超重24-28 肥胖大于28
	减重速度	理论上2周减重2%，注意1-2周的体重比较才有意义，每天脂肪分解量只有30-50g，会被体内的食糜重量和含水量变化轻易覆盖，所以两三天的体重变化基本和脂肪量变化无关，没有参考意义
	减到何时	肌肉量一般，不要追求低体脂，男性BMI22-23转增肌，女性BMI20-21转增肌；肌肉量足够，可以减到更低体重成为低体脂，男性BMI21-22转增肌，女性BMI19-20转增肌
	调整配额	体重下降10kg，基础代谢才会下降约150大卡，如果减重10kg以内不用调整；如果减重达到10kg还要继续，为了损失的150大卡，可以每天少吃约40g碳水（130g米饭），或者每周增加跑步/爬楼/打球1.5-2小时，或者两者各半
	力训时间	上午起床晚，早饭后练， 因此早饭作为练前餐垫肚子，练后吃午饭作为练后餐；力训日全天餐序：①早饭=练前餐 ②午饭=练后餐 ③晚饭=其他餐
	热量设计 （不用看）	基础数据	基础代谢(a)	自己输入		* 多算两次，切勿算错，否则后续会全错！Mifflin-St Jeor方程：男性基础代谢=体重kg×9.99+身高cm×6.25-年龄×4.92+5；女性基础代谢=体重kg×9.99+身高cm×6.25-年龄×4.92-161
			无运动总消耗(b=a÷0.7)	自己输入		* 在没有力训、有氧的情况下，基础代谢约占人体热量消耗的70%，其余的热量消耗为食物热效应和活动消耗（因为无运动，活动消耗就是日常活动消耗）
			力训消耗(c)	自己输入		* 力训的热量消耗建议数据：男性，200大卡（新手）、250大卡（有基础）、300大卡（老手）；女性，100大卡（新手）、150大卡（有基础）、200大卡（老手）
			有氧消耗(d)	自己输入		* 如果要做有氧，参考《有氧热量消耗》表的数字填报（注意这是平均到每天的数字，如果是一周有氧消耗，要除以7再填入）
		平衡热量	力训日(e1=b+c+d)	自己输入		* 这是理论上的平衡热量，意即理论上这个饮食热量能让体重不变，力训日因为多了力训的热量消耗，所以力训日的平衡热量高一些
			休息日(e2=b+d)	自己输入
		应吃热量	力训日(f1=e1×0.64)	自己输入		* 减脂的合适热量缺口为10-30%（取20%），此外研究表明人们在定量饮食里也会不自觉多吃10-30%热量（取20%），所以减脂的应吃热量计为上述理论平衡热量的1×80%×80%=64%
			休息日(f2=e2×0.64)	自己输入
	饮食总览			碳水				蛋白质				脂肪	蔬菜/水果
		力训日		输入配额		输入体重	相乘得出总量	输入配额		输入体重	相乘得出总量	男性60g（120kg体重以上加到70g） 女性50g 但不要细算脂肪 按下面的文字指导来吃就行	按下面的文字指导
		休息日		输入配额		输入体重	相乘得出总量	输入配额		输入体重	相乘得出总量
	运动总览	力训		力训和减脂没有直接关系，减脂需要的热量缺口可以用饮食来提供，而不是必须力训来提供；但力训的好处是能减少减脂期的肌肉损失，想保持肌肉需要练3-5次/周
		有氧		是否需要有氧，请看视频11分8秒，一般建议：增肌不做有氧；减脂体重80kg以上不做有氧；减脂体重70-80kg先不做有氧，如果饿再加有氧；减脂体重70kg以下每周2小时有氧
HR														SS
	力训日饮食
	* 食物的123456是任选一种，不是都吃，每种食物互相等价，碳水或蛋白质的量是相同的 * 食物重量我已给你算好，你在初期必须用食物称定量饮食，建立饮食习惯后就不用了
	餐序			碳水				蛋白质				脂肪	蔬菜/水果
	①早饭=练前餐			0				0				脂肪这样吃↓	蔬菜不限制↓
				1.	0			1.	鸡蛋+牛奶，数量参考视频25分30秒			【推荐模式】早饭吃左侧的蛋黄牛奶+正餐吃大众带油菜=脂肪摄入基本合适 :)	【蔬菜不用定量】蔬菜碳水率很低，为免麻烦不用定量，争取每天都能吃一些
				2.	0			2.	鸡蛋，数量参考视频25分30秒
				3.	0			3.	0			* 所谓吃“大众带油菜”，就是像黄焖鸡、酸菜鱼、鱼香肉丝、小炒牛肉等家常瘦肉菜，不要害怕菜里的油，但必须是瘦肉，高脂肉会导致脂肪超标（下面讲了什么是瘦肉，什么是高脂肉）	* 吃蔬菜的顺序：一般各餐，先吃、多吃蔬菜，后吃碳水，能压制胰岛素，帮助减脂；但力训的练后餐则相反，建议先吃碳水和蛋白质，少吃、后吃蔬菜，避免胰岛素被压制
	* 吃了早饭就准备开练，不需要专门等待休息 * 怕太饱的话，可吃低饱腹感碳水（馒头/面包/面条）			4.	0			4.	0
				5.	0			* 脂肪摄入一个基本来源是早饭的蛋黄牛奶，如果不吃蛋黄牛奶，请看右边脂肪一列【脂肪缺乏1】
				6.	0
				7.	0							【脂肪缺乏1】早饭不吃蛋黄牛奶，会比推荐模式少吃约10-20g脂肪摄入，请补吃20g坚果或3个蛋黄	【这些不是蔬菜】红薯（20%）、土豆（18%）、玉米（18%）、山药（13%）、芋头（13%）是碳水主食，括号数字是其碳水率
	②午饭=练后餐			0				0
				1.	0			1.	0
				2.	0			2.	0			【脂肪缺乏2】正餐吃低油无油菜（卤肉、炖肉、清炒、清炖、轻食、水煮），会比推荐模式少吃约20g脂肪摄入，请补吃30g坚果或4个蛋黄
	* 最好能练完后半小时内开始吃上 * 本餐如要吃蔬菜，少吃后吃以免压制胰岛素 * 有时没正餐可吃，可用便携快碳+蛋白粉解决			3.	0			* 脂肪摄入另一基本来源是吃炒菜时摄入的油，如果正餐吃低油无油菜（卤肉、炖肉、清炒、清炖、轻食、水煮），请看右边脂肪一列【脂肪缺乏2】
				4.	0							——————————————————	——————————————————
				5.	0							脂肪基本不吃↓	水果必须置换主食↓
				6.	0							【高脂肉】鸡鸭的皮、猪大排、糖醋里脊、锅包肉、炸鸡、烤肉、午餐肉、肥牛、肥羊、排骨、牛排、肉肠、肉饼、肉馅、肉丸	【水果要算碳水】水果实质是糖水，糖量可观，糖是碳水的一种形式，所以要计入碳水量来置换碳水那列的主食
	③晚饭=其他餐			0				0
				1.	0			1.	0
				2.	0			* 瘦肉只有：①没有白色脂肪层的猪牛羊肉 ②去皮的鸡鸭肉 ③鱼虾贝 ④肝肾肚血 * 这些不是瘦肉：鸡鸭的皮、猪大排、糖醋里脊、锅包肉、炸鸡、烤肉、午餐肉、肥牛、肥羊、排骨、牛排、肉肠、肉饼、肉馅、肉丸				* 瘦肉只有：①没有白色脂肪层的猪牛羊肉 ②去皮的鸡鸭肉 ③鱼虾贝 ④肝肾肚血	*苹果/橙子/香蕉：20-30g碳水/个；梨子/蓝莓/猕猴桃：碳水率14%；柚子/桃子/葡萄/菠萝：碳水率10%；西瓜/蜜瓜/草莓：碳水率7%
				3.	0
				4.	0							【糖油混合物】饼干、蛋糕、点心、糕点、甜品、油条、煎饼、高脂面包、膨化食品等	【置换主食的办法】吃水果的10g碳水=主食少吃30g熟米饭
				5.	0
	⑤零食/夜宵			0				0				* 糖油混合物的脂肪率高达20-40%，一次容易吃两三百克之多，只能偶尔吃点解馋
				1.	不吃碳水食物（水果、面包、奶茶、米面）			1.	0
	* 如果不吃零食/夜宵，请看右边红字的指导			2.	不吃糖油混合物（饼干、糕点、膨化食品）			2.	其他可选：乳制品、鸡蛋、蔬菜、无糖饮料			【个别吸油菜】炒鸡蛋、炒茄子
				* 这10%的碳水是用来抵扣本列未计入的牛奶、蔬菜、调料里的碳水，所以不另外吃含碳水的食物了				* 你不吃零食夜宵也可以，就把这上面这点蛋白质配额给其他几餐，量并不多				* 食堂外卖的宽油炒鸡蛋，每个鸡蛋的蛋白质只有6g，脂肪或高达20g以上，非常占据脂肪配额
	力训日合计			0				75				要点：脂肪配额有限 用来吃炒菜和蛋奶	要点：蔬菜任意吃 水果要算碳水
HR														SS
	休息日饮食
	* 食物的123456是任选一种，不是都吃，每种食物互相等价，碳水或蛋白质的量是相同的 * 食物重量我已给你算好，你在初期必须用食物称定量饮食，建立饮食习惯后就不用了
	餐序			碳水				蛋白质				脂肪	蔬菜/水果
	①早饭（和绿表早饭完全相同）			0				0				同上表	同上表
				1.	0			1.	鸡蛋+牛奶，数量参考视频25分30秒
				2.	0			2.	鸡蛋，数量参考视频25分30秒
				3.	0			3.	0
				4.	0			4.	0
				5.	0			* 脂肪摄入一个基本来源是早饭的蛋黄牛奶，如果你不吃蛋黄牛奶，请看右边脂肪一列的【脂肪缺乏1】
				6.	0
				7.	0
	②午饭			0				0
				1.	0			1.	0
				2.	0			* 脂肪摄入另一基本来源是带油菜的用油，如果你的正餐吃低油无油菜（卤肉、炖肉、清炒、清炖、轻食、水煮），请看右边脂肪一列的【脂肪缺乏2】
				3.	0
				4.	0
				5.	0
	③晚饭			0				0
				1.	0			1.	0
				2.	0			* 瘦肉脂肪率一般不超过5%，基本只有：①没有白色黄色脂肪层的猪牛羊肉 ②去皮鸡鸭肉 ③鱼虾 * 这些都不是瘦肉：鸡皮鸭皮、猪大排、糖醋里脊、锅包肉、烤肉、午餐肉、肥牛、肥羊、排骨、牛排、肉肠、肉饼、肉馅、肉丸
				3.	0
				4.	0
				5.	0
	⑤零食/夜宵			0				0
				不吃碳水食物（水果、面包、奶茶、米面）				1.	0
	* 如果不吃零食/夜宵，请看右边红字的指导			不吃糖油混合物（饼干、糕点、膨化食品）				2.	其他可选：乳制品、鸡蛋、蔬菜、无糖饮料
				* 这10%的碳水配额是用来抵扣本列未计入的牛奶、蔬菜、调料的碳水，所以不另外吃含碳水的食物了				* 你不吃零食夜宵也可以，就把这上面这点蛋白质配额给其他几餐，量其实很少的
	休息日合计			0				0				要点：脂肪配额有限 用来吃炒菜和蛋奶	要点：蔬菜任意吃 水果要算碳水
HR														SS
	力训方案
	频率			力训和减脂没有直接关系，减脂需要的热量缺口可以用饮食来提供，而不是必须力训来提供；但力训的好处是能减少减脂期的肌肉损失，想保持肌肉需要练3-5次/周
	分化			完全新手：用二分化或三分化；有基础者：用三分化或四分化
	场所			新手尽量从健身房起步健身，非必要不要居家力训，居家力训对新手反而更难上手，如果必须居家健身，参照《训练计划-居家健身》的指导
	训练计划			三分化/四分化/居家训练计划，详见《问答汇总》第19/20/21问答
HR														SS
	有氧方案
	概况			是否需要有氧，请看视频11分8秒，一般建议：增肌不做有氧；减脂体重80kg以上不做有氧；减脂体重70-80kg先不做有氧，如果饿再加有氧；减脂体重70kg以下每周2小时有氧
	形式			快走、跑步、骑行、游泳、爬楼、跳操、打球等均可，可以自测15秒脉搏算下心率，建议120-150次/分钟，但无需严格要求，有的有氧运动心率是高低波动不稳定的
	时间点			①力训前，不要做有氧，会影响力训；②力训后，如果要做有氧，一般不要超过30分钟；③超过30分钟的有氧，要和力训隔开几小时，或者在休息日做
	有氧可以置换饮食（重要）			如果试吃后感觉很饿，就可以增加有氧来让自己多吃一点，每增加有氧消耗100大卡，饮食热量就能多吃100大卡，具体请看配套的《有氧热量消耗》那张表
S

[truncated: 14 more sheets: 3减脂-午饭前练, 4减脂-午饭后练, 5减脂-晚饭前练, 6减脂-晚饭后练, 7减脂-夜里练, 8减脂-无力训者, 9增肌-早饭后练（早起版）, 10增肌-早饭后练（晚起版）, 11增肌-午饭前练, 12增肌-午饭后练, 13增肌-晚饭前练, 14增肌-晚饭后练, 15增肌-夜里练, lower limb cycle ergometer]
